# Supplementary material
Source: PubMed Central journal article supplement (PMC4142257)
Supplement: mmc1.pdf [file mmc1.pdf]

## Quantitation of Malaria Parasite-Erythrocyte Cell-Cell Interactions Using Optical Tweezers

Alex J. Crick,<sup>1</sup> Michel Theron,<sup>2</sup> Teresa Tiffert,<sup>3</sup> Virgilio L. Lew,<sup>3</sup> Pietro Cicuta,<sup>1\*</sup> and Julian C. Rayner<sup>2\*</sup>

<sup>1</sup>Cavendish Laboratory, University of Cambridge, Cambridge, United Kingdom; <sup>2</sup>Wellcome Trust Sanger Institute, Hinxton, Cambridge, United Kingdom; and <sup>3</sup>Department of Physiology, Development and Neuroscience, University of Cambridge, Cambridge, United Kingdom

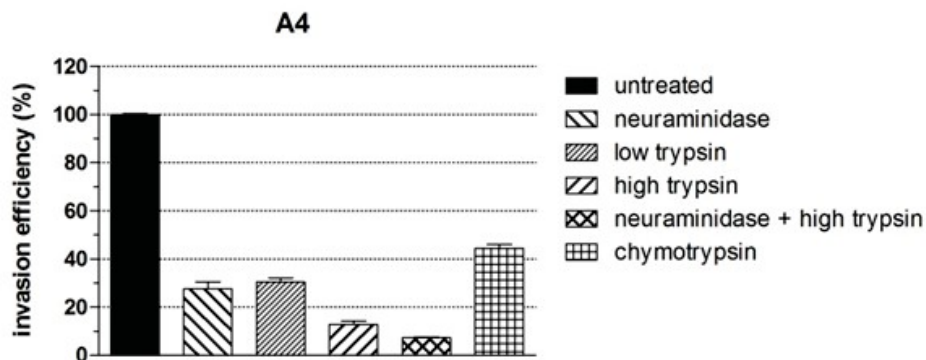

Figure S1: Reinvasion rates of the *P. falciparum* strain A4, derived from the ITO4 line, showing a ~60% inhibition for erythrocytes pre-treated with chymotrypsin.

Movies:
